# Supplementary material for: Conjugated polymer dots/oxalate anodic electrochemiluminescence system and its application for detecting melamine
Source: Royal Society of Chemistry journal article supplement (doi:10.1039/c5ra10809h), 2015-01-01
Supplement: c5ra10809h1.pdf [file c5ra10809h1.pdf]

## Supplementary Information

Conjugated Polymer Dots/Oxalate Anodic Electrochemiluminescence

System and Its Application for detecting Melamine

Qiyi Lu,<sup>a</sup> Juanjuan Zhang,<sup>a</sup> Yuanya Wu<sup>b</sup> and Shihong Chen<sup>\*a</sup>

<sup>a</sup> Key Laboratory of Luminescent and Real-Time Analytical Chemistry (Southwest University) ,  
Ministry of Education, College of Chemistry and Chemical Engineering, Southwest University,  
Chongqing 400715, PR China

<sup>b</sup> Chongqing Key Laboratory for Advanced Materials and Technologies of Clean Electrical Power  
Sources, Institute for Clean Energy & Advanced Materials, Southwest University, Chongqing  
400715, P.R. China

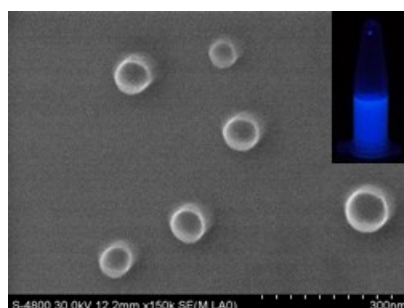

**Fig. S1.** SEM images of PFO dots. Inset: the fluorescent photo of the PFO dots illuminated by a UV beam of 365 nm

**Table S1** Comparison of this study with other sensor for the detection of Mel.

| Electrodes                                                                             | Method | Linear range (M)                              | Detection limit (M)   | references |
|----------------------------------------------------------------------------------------|--------|-----------------------------------------------|-----------------------|------------|
| poly(para-aminobenzoic acid) film/GCE                                                  | CV     | $4.0 \times 10^{-6} \sim 4.5 \times 10^{-4}$  | $3.6 \times 10^{-7}$  | 1          |
| Ru(bpy) <sub>3</sub> <sup>2+</sup> /mesoporous silica nanospheres/Nafion composite/GCE | ECL    | $7.8 \times 10^{-9} \sim 5.0 \times 10^{-6}$  | $2.6 \times 10^{-9}$  | 2          |
| CdTe QDs/GCE                                                                           | ECL    | $1.0 \times 10^{-9} \sim 1.0 \times 10^{-5}$  | $6.7 \times 10^{-10}$ | 3          |
| Luminol/GCE                                                                            | ECL    | $8.0 \times 10^{-9} \sim 8.0 \times 10^{-7}$  | $8.0 \times 10^{-10}$ | 4          |
| PFO/GCE                                                                                | ECL    | $9.0 \times 10^{-11} \sim 1.1 \times 10^{-8}$ | $2.7 \times 10^{-11}$ | This work  |

**Table S2** Recoveries of Mel in milk sample at PFO/GCE.

| Sample | Added(nM) | Found(nM) | Recovery(%) |
|--------|-----------|-----------|-------------|
| milk   | 1.50      | 1.45      | 96.7        |
|        | 3.20      | 3.30      | 103         |
|        | 9.00      | 9.10      | 101         |

## References

- 1 H. M. Cao, X. Q. Hu, C. Y. Hu, Y. Zhang, N. Q. Jia, *Biosens. Bioelectron.*, 2013, **41** 911–915.
- 2 F. Y. Liu, X. Yang, S. G. Sun, *Analyst*, 2011, **136**, 374–378.
- 3 Y. T. Liu, J. Deng, X. L. Xiao, L. Ding, Y. L. Yuan, H. Li, X. T. Li, X. N. Yan, L. L. Wang, *Electrochim. Acta*, 2011, **56**, 4595–4602.
- 4 W. Jing, S. Y. Lü, X. J. Li, X. F. Jiang, M. S. Chen, M. Liang, X. Tang, C. M. Xu, J. Q. Chen, *Chin. J. Chem.* 2011, **29**, 1601–1605.
